# Supplementary material
Source: bioRxiv or medRxiv preprint supplement (https://www.biorxiv.org/highwire/filestream/71684/field_highwire_adjunct_files/2/233825-3.pdf)
Supplement: Supplementary file [file 233825-3.pdf]

**TABLE S3. RESULTS OF BREEDING CSMD1-/- C3-/- DOUBLE KNOCKOUTS**

| Genotype      | Sex | Mated with    | Duration of Mating | litter born | 1st Litter Size  | 2nd Litter Size | 3rd Litter Size |
|---------------|-----|---------------|--------------------|-------------|------------------|-----------------|-----------------|
| Csmd-/- C3-/- | M   | Csmd-/- C3-/- | 5 months           | No          |                  |                 |                 |
| Csmd-/- C3-/- | M   | Csmd-/- C3-/- | 5 months           | No          |                  |                 |                 |
| Csmd-/- C3-/- | F   | Csmd-/- C3-/- | 5 months           | No          |                  |                 |                 |
| Csmd-/- C3-/- | F   | Csmd-/- C3-/- | 5 months           | No          |                  |                 |                 |
| Csmd-/- C3-/- | M   | Csmd-/- C3-/- | 5 months           | No          |                  |                 |                 |
| Csmd-/- C3-/- | M   | Csmd-/- C3-/- | 5 months           | No          |                  |                 |                 |
| Csmd-/- C3-/- | F   | Csmd-/- C3-/- | 5 months           | No          |                  |                 |                 |
| Csmd-/- C3-/- | F   | Csmd-/- C3-/- | 5 months           | No          |                  |                 |                 |
| Csmd-/- C3-/- | M   | WT (2)        | 7 months           | No          |                  |                 |                 |
| Csmd-/- C3-/- | M   | WT(1)         | 5 months           | Yes         | 3                | 4               | 3               |
| Csmd-/- C3-/- | M   | WT(1)         | 5 months           | yes         | 2                | 7               | 5               |
| Csmd-/- C3-/- | F   | WT(1)         | 5 months           | yes         | 4                | 6               |                 |
| Csmd-/- C3-/- | M   | WT(1)         | 3 months           | No          |                  |                 |                 |
| Csmd-/- C3-/- | M   | WT(1)         | 3 months           | Eut'zd      | died in delivery |                 |                 |
| Csmd-/- C3-/- | M   | WT(1)         | 3 months           | No          |                  |                 |                 |
| Csmd-/- C3-/- | F   | WT(1)         | 3 months           | No          |                  |                 |                 |
| Csmd-/- C3-/- | F   | WT(1)         | 3 months           | Found Dead  |                  |                 |                 |
| Csmd-/- C3-/- | F   | WT(1)         | 3 months           | No          |                  |                 |                 |
| Csmd-/- C3-/- | F   | WT(1)         | 3 months           | No          |                  |                 |                 |
